# Supplementary material
Source: PubMed Central journal article supplement (PMC9070743)
Supplement: Supp_Fig1.pdf [file Supp_Fig1.pdf]

## Supplementary Data

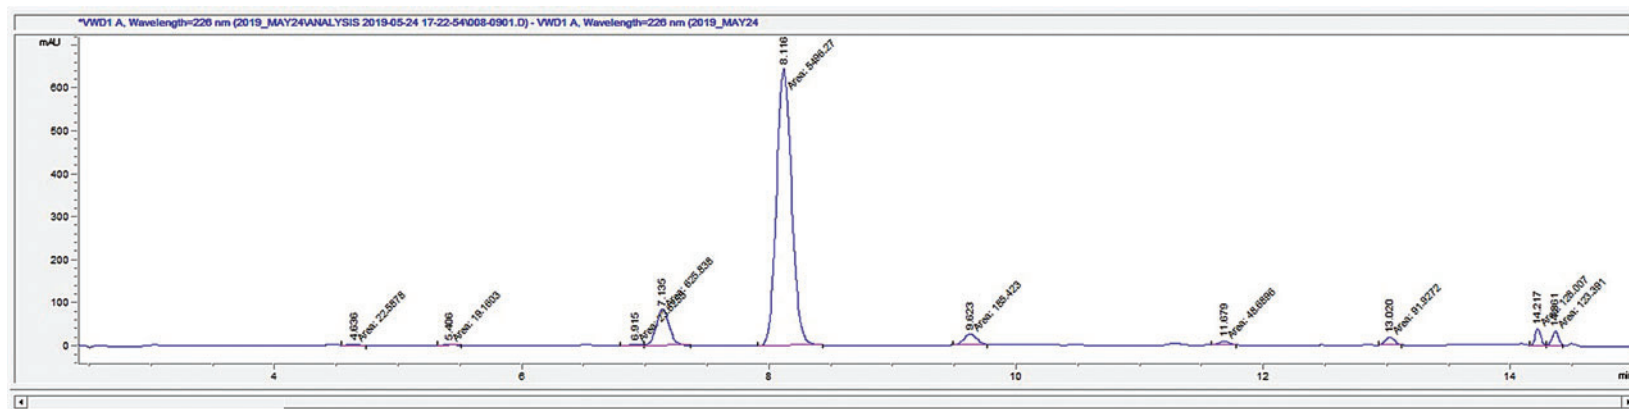

### File Information

|               |                                                         |
|---------------|---------------------------------------------------------|
| LC-File       | 008-0901.D                                              |
| File Path     | C:\CHEM32\1\DATA\2019_MAY24\ANALYSIS 2019-05-24 17-22-5 |
| Date          | 24-May-19, 20:38:29                                     |
| Sample        | AR0413-2A                                               |
| Sample Info   |                                                         |
| Barcode       |                                                         |
| Operator      | NC                                                      |
| Method        | PV001.M                                                 |
| Analysis Time | 14.997 min                                              |
| Sampling Rate | 0.0012 min (0.072 sec), 12361 datapoints                |

| #  | Time   | Area   | Height | Width  | Area%  | Symmetry |
|----|--------|--------|--------|--------|--------|----------|
| 1  | 4.636  | 22.6   | 3.4    | 0.1117 | 0.334  | 1.169    |
| 2  | 5.406  | 19.2   | 3.4    | 0.0949 | 0.283  | 0.984    |
| 3  | 6.915  | 23.6   | 3.6    | 0.1085 | 0.349  | 0.956    |
| 4  | 7.135  | 625.8  | 83.9   | 0.1243 | 9.251  | 0.935    |
| 5  | 8.116  | 5496.3 | 645.4  | 0.1419 | 81.247 | 0.896    |
| 6  | 9.623  | 185.4  | 25.1   | 0.1229 | 2.741  | 0.933    |
| 7  | 11.679 | 48.7   | 8.7    | 0.0932 | 0.720  | 1.057    |
| 8  | 13.020 | 91.9   | 18.6   | 0.0826 | 1.359  | 0.987    |
| 9  | 14.217 | 128    | 38.8   | 0.095  | 1.892  | 0.857    |
| 10 | 14.361 | 123.4  | 34.8   | 0.0591 | 1.824  | 1.072    |

**SUPPLEMENTARY FIG. S1.** A chromatogram of test sample containing (in order of elution) CBDV, CBDVA, CBG, CBD, CBDA, CBGA, THC, THCA, and CBCA. CBD, cannabidiol; CBDA, cannabidiolic acid; CBDV, cannabidivarin; CBDVA, cannabidivarin acid; CBCA, cannabichromenic acid; CBG, cannabigerol; CBGA, cannabigerolic acid; THC,  $\Delta^9$ -tetrahydrocannabinol; THCA, tetrahydrocannabinolic acid.
