# Supplementary material
Source: PubMed Central journal article supplement (PMC9070743)
Supplement: Supp_Table1.pdf [file Supp_Table1.pdf]

**Supplementary Table S1. The Advertised Cannabidiol Content and the Actual Measured Cannabidiol and Other Phytocannabinoids of 29 Over-the-Counter Cannabidiol Products Available in the United Kingdom**

|      | Advertised CBD (%) | Actual measured phytocannabinoid content (%) |       |       |       |       |       |       |       |       |       |       |       |       |       | Actual content as a percentage of advertised content |
|------|--------------------|----------------------------------------------|-------|-------|-------|-------|-------|-------|-------|-------|-------|-------|-------|-------|-------|------------------------------------------------------|
|      |                    | CBD                                          | CBDA  | CBDVA | CBDV  | 9-THC | 8-THC | CBN   | THCA  | THCVA | THCV  | CBGA  | CBG   | CBCA  | CBC   |                                                      |
| 1    | 15                 | 14.8                                         | 0.76  | —     | 0.29  | 0.21  | —     | 0.08  | —     | —     | —     | —     | 0.06  | —     | 0.51  | 99                                                   |
| 2    | 10                 | 0.72                                         | 0.65  | 0.01  | 0.04  | 0.02  | —     | 0.01  | 0.02  | —     | —     | 0.01  | 0.01  | 0.05  | 0.05  | 7                                                    |
| 3    | 10                 | 4.97                                         | 4.22  | 0.08  | 0.21  | 0.15  | —     | 0.02  | 0.06  | —     | —     | 0.02  | 0.03  | 0.17  | 0.15  | 50                                                   |
| 4    | 8                  | 7.74                                         | 0.01  | —     | 0.17  | —     | —     | —     | —     | —     | —     | —     | —     | —     | —     | 97                                                   |
| 5    | 6                  | 6.53                                         | 0.02  | —     | 1.44  | 0.01  | —     | —     | —     | —     | 0.25  | —     | 0.16  | —     | —     | 109                                                  |
| 6    | 5                  | 0.94                                         | 4.65  | 0.02  | 0.03  | 0.09  | —     | —     | 0.13  | —     | —     | 0.16  | 0.04  | 0.29  | 0.08  | 19                                                   |
| 7    | 5                  | 5.48                                         | 0.07  | 0.01  | 1.11  | 0.01  | —     | —     | —     | —     | 0.41  | —     | 0.24  | —     | —     | 110                                                  |
| 8    | 5                  | 4.54                                         | 0.33  | —     | 0.03  | 0.01  | —     | —     | 0.01  | —     | —     | —     | —     | 0.01  | 0.01  | 91                                                   |
| 9    | 5                  | 5.2                                          | —     | —     | 0.03  | —     | —     | —     | —     | —     | —     | —     | —     | —     | —     | 104                                                  |
| 10   | 5                  | 0                                            | —     | —     | —     | —     | —     | —     | —     | —     | —     | —     | —     | —     | —     | 0                                                    |
| 11   | 5                  | 0.26                                         | —     | —     | —     | —     | —     | —     | —     | —     | —     | —     | —     | —     | —     | 5                                                    |
| 12   | 5                  | 0.03                                         | 0.14  | —     | —     | —     | —     | —     | —     | —     | —     | —     | —     | 0.01  | —     | 1                                                    |
| 13   | 5                  | 5.49                                         | —     | —     | 0.02  | —     | —     | —     | —     | —     | —     | 0.05  | —     | —     | —     | 110                                                  |
| 14   | 4                  | 4.31                                         | 0.04  | —     | 0.12  | —     | —     | 0.01  | —     | —     | —     | 0.04  | 0.07  | —     | —     | 108                                                  |
| 15   | 4                  | 4.5                                          | 0.87  | —     | 0.09  | 0.04  | 0.02  | 0.12  | —     | —     | —     | 0.06  | 0.03  | 0.06  | 0.12  | 113                                                  |
| 16   | 3.3                | 5.12                                         | 0.02  | —     | 0.03  | 0.02  | —     | —     | —     | —     | —     | 0.09  | 0.02  | —     | 0.04  | 155                                                  |
| 17   | 3                  | 0.19                                         | 0.02  | —     | —     | —     | —     | —     | —     | —     | —     | —     | —     | —     | —     | 6                                                    |
| 18   | 3                  | 0.89                                         | 0.02  | —     | 0.03  | 0.03  | —     | —     | 0.01  | —     | —     | —     | 0.01  | —     | 0.03  | 30                                                   |
| 19   | 3                  | 2.88                                         | —     | —     | 0.01  | —     | —     | —     | —     | —     | —     | —     | 0.58  | —     | —     | 96                                                   |
| 20   | 3                  | 3.49                                         | —     | —     | 0.02  | —     | —     | —     | —     | —     | —     | —     | —     | —     | —     | 116                                                  |
| 21   | 3                  | 3                                            | —     | —     | —     | —     | —     | —     | —     | —     | —     | —     | —     | —     | —     | 100                                                  |
| 22   | 2.8                | 1.18                                         | 1.27  | 0.02  | 0.05  | 0.04  | —     | 0.01  | 0.05  | —     | —     | 0.03  | 0.02  | 0.09  | 0.07  | 42                                                   |
| 23   | 2.5                | 2.23                                         | —     | —     | 0.01  | —     | —     | —     | —     | —     | —     | —     | —     | —     | —     | 89                                                   |
| 24   | 2.5                | 2.7                                          | 0.39  | 0.02  | 0.14  | 0.22  | —     | 0.05  | 0.02  | —     | 0.01  | 0.27  | 0.02  | 0.03  | 0.14  | 108                                                  |
| 25   | 2.5                | 2.15                                         | 0.76  | 0.01  | 0.02  | 0.02  | —     | —     | 0.03  | —     | —     | 0.1   | —     | 0.06  | 0.02  | 86                                                   |
| 26   | 1.7                | 1.9                                          | —     | —     | —     | —     | —     | —     | —     | —     | —     | —     | —     | —     | —     | 112                                                  |
| 27   | 1                  | 0.84                                         | —     | —     | 0.01  | 0.03  | —     | —     | —     | —     | —     | —     | 0.01  | —     | 0.03  | 84                                                   |
| 28   | 1                  | 0.32                                         | 0.01  | —     | 0.01  | —     | —     | —     | —     | —     | —     | —     | —     | —     | 0.01  | 32                                                   |
| 29   | 0.8                | 0.92                                         | 0.02  | —     | 0.01  | 0.1   | —     | —     | 0.01  | —     | —     | 0.01  | 0.02  | 0.03  | 0.03  | 115                                                  |
| Mean | 4.486              | 3.218                                        | 0.492 | 0.006 | 0.135 | 0.034 | 0.001 | 0.010 | 0.012 | 0.000 | 0.023 | 0.029 | 0.046 | 0.028 | 0.044 | 76                                                   |

CBD, cannabidiol; CBDA, cannabidiolic acid; CBDV, cannabidivarin; CBDVA, cannabidivarin acid; CBN, cannabinol; CBCA, cannabichromenic acid; CBC, cannabichromene; CBG, cannabigerol; CBGA, cannabigerolic acid; THC,  $\Delta^9$ -tetrahydrocannabinol; THCA, tetrahydrocannabinolic acid; THCVA, tetrahydrocannabivarinic acid; THCV, tetrahydrocannabivarin.
