# Supplementary material
Source: PubMed Central journal article supplement (PMC9070743)
Supplement: Supp_Table2.pdf [file Supp_Table2.pdf]

**Supplementary Table S2. The Levels of Residual Solvents and Heavy Metals in 29 Over-the-Counter Cannabidiol Products Available in the United Kingdom**

| Solvents and heavy metals (mg/kg or ppm) |           |           |               |         |             |               |         |        |             |      |         |         |         |
|------------------------------------------|-----------|-----------|---------------|---------|-------------|---------------|---------|--------|-------------|------|---------|---------|---------|
| Product                                  | N-pentane | Ethanol   | Ethyl acetate | Acetone | Isopropanol | Diethyl ether | Heptane | Hexane | Cyclohexane | Lead | Arsenic | Cadmium | Mercury |
| 1                                        | 0.40      | —         | 3.70          | —       | —           | —             | —       | 0.60   | —           | —    | —       | —       | —       |
| 2                                        | -         | —         | —             | —       | —           | —             | —       | —      | —           | 0.01 | —       | —       | —       |
| 3                                        | 0.30      | —         | —             | —       | —           | —             | —       | —      | —           | 0.01 | —       | —       | —       |
| 4                                        | 42.70     | —         | —             | —       | 424.30      | —             | 47.50   | —      | —           | —    | 0.01    | —       | —       |
| 5                                        | 1.30      | —         | —             | —       | 10.20       | —             | —       | 0.60   | —           | —    | —       | —       | —       |
| 6                                        | 0.40      | —         | —             | —       | —           | —             | —       | —      | —           | —    | 0.01    | —       | —       |
| 7                                        | 0.20      | —         | —             | —       | —           | —             | —       | —      | —           | —    | —       | —       | —       |
| 8                                        | 0.30      | 35.90     | —             | —       | —           | —             | —       | —      | —           | 0.21 | —       | —       | —       |
| 9                                        | 0.90      | 37,704.60 | 103.80        | —       | —           | —             | —       | —      | —           | 0.01 | —       | —       | —       |
| 10                                       | 21.70     | —         | —             | —       | —           | —             | —       | —      | —           | —    | —       | —       | —       |
| 11                                       | 0.40      | —         | —             | —       | 56.40       | —             | —       | —      | —           | —    | —       | —       | —       |
| 12                                       | 0.40      | —         | —             | —       | —           | —             | —       | —      | —           | 0.24 | —       | —       | —       |
| 13                                       | 0.50      | 417.70    | —             | —       | —           | 1.00          | 0.10    | —      | —           | 0.07 | —       | —       | —       |
| 14                                       | 1.10      | 17.80     | —             | —       | —           | 0.60          | —       | —      | —           | —    | —       | —       | —       |
| 15                                       | 11.70     | 29.30     | —             | —       | —           | —             | —       | —      | —           | —    | —       | —       | —       |
| 16                                       | 0.40      | —         | —             | —       | —           | —             | —       | —      | —           | —    | —       | —       | —       |
| 17                                       | 0.20      | —         | —             | —       | —           | —             | 0.40    | —      | —           | —    | —       | —       | —       |
| 18                                       | 0.80      | 31.90     | —             | —       | —           | —             | —       | —      | —           | —    | —       | —       | —       |
| 19                                       | 0.20      | 16.30     | —             | —       | 1.80        | —             | —       | —      | —           | —    | —       | —       | —       |
| 20                                       | 0.40      | —         | —             | —       | —           | —             | 3.30    | —      | —           | —    | —       | —       | —       |
| 21                                       | 0.40      | 6.30      | —             | 2.50    | —           | —             | —       | —      | 27.90       | —    | —       | —       | —       |
| 22                                       | 1.50      | —         | —             | —       | 6.10        | —             | —       | —      | —           | —    | —       | —       | —       |
| 23                                       | 0.50      | —         | —             | —       | —           | —             | —       | —      | —           | —    | —       | —       | —       |
| 24                                       | 0.50      | —         | —             | 2.50    | 11.60       | —             | —       | —      | —           | —    | —       | —       | —       |
| 25                                       | 0.40      | —         | —             | —       | —           | —             | —       | —      | —           | —    | —       | —       | —       |
| 26                                       | 0.40      | —         | —             | —       | —           | —             | —       | —      | —           | —    | —       | —       | —       |
| 27                                       | 0.30      | —         | —             | —       | —           | —             | —       | 0.20   | —           | —    | —       | —       | —       |
| 28                                       | 0.40      | —         | —             | —       | —           | —             | 0.40    | 0.70   | 1.70        | —    | —       | —       | —       |
| 29                                       | 0.80      | 5.70      | —             | —       | —           | —             | 0.20    | —      | —           | —    | 0.06    | —       | —       |
| Mean                                     | 3.09      | 1319.50   | 3.71          | 0.17    | 17.60       | 0.06          | 1.79    | 0.07   | 1.02        | 0.09 | 0.02    | 0.00    | 0.00    |
